# Supplementary material for: Solanum lycopersicum Seedlings. Metabolic Responses Induced by the Alkamide Affinin
Source: MDPI journal article supplement (doi:10.3390/metabo11030143), 2021-02-27
Supplement: s1 [file s1]

Table S1. Retention times (RT), Metabolite, trimethylsilyl derivative (TMS) and Peak Purity used for identification of the compounds detected in shoots and roots of tomato seedlings by GC/EIMS.

| ID | RT (min) | Metabolite                       | TMS  | Peak Purity | Shoot | Root | ChEBI ID | Category     |
|----|----------|----------------------------------|------|-------------|-------|------|----------|--------------|
| 1  | 13.3040  | Ethylamine                       | 2TMS | 90          | +     | +    | 15862    | Others       |
| 2  | 16.4028  | Lactate                          | 2TMS | 96          | +     | +    | 24996    | Organic acid |
| 3  | 16.7564  | Glycolate                        | 2TMS | 74          | +     | +    | 29805    | Organic acid |
| 4  | 17.8287  | Alanine                          | 2TMS | 92          | +     | +    | 15570    | Amino acid   |
| 5  | 17.9175  | Levulinic acid                   | 1TMS | 85          | +     | +    | 45630    | Others       |
| 6  | 18.1660  | Oxalate                          | 2TMS | 79          | -     | +    | 16995    | Organic acid |
| 7  | 19.7151  | Phosphoric acid monomethyl ester | 2TMS | 98          | +     | +    | 340824   | Others       |
| 8  | 19.8428  | Cadaverine                       | 4TMS | 70          | -     | +    | 18127    | Others       |
| 9  | 21.0792  | 3-Hydroxyisovalerate             | 2TMS | 70          | +     | +    | 82957    | Others       |
| 10 | 21.4034  | Valine                           | 2TMS | 96          | +     | +    | 27266    | Amino acid   |
| 11 | 21.6860  | Urea                             | 2TMS | 93          | +     | +    | 16199    | Others       |
| 12 | 22.8820  | Phosphoric acid                  | 3TMS | 96          | +     | +    | 26078    | Others       |
| 13 | 23.0354  | Leucine                          | 2TMS | 84          | +     | +    | 25017    | Amino acid   |
| 14 | 23.1025  | Ethanolamine                     | 3TMS | 94          | +     | +    | 16000    | Others       |
| 15 | 23.3084  | Glycerol                         | 3TMS | 97          | +     | +    | 17754    | Others       |
| 16 | 23.3435  | Maleate                          | 2TMS | 87          | +     | +    | 18300    | Organic acid |
| 17 | 23.6710  | Isoleucine                       | 2TMS | 80          | +     | +    | 27730    | Amino acid   |
| 18 | 23.6837  | Succinate                        | 2TMS | 90          | +     | +    | 15741    | Organic acid |
| 19 | 24.0794  | Glycine                          | 3TMS | 96          | +     | +    | 15428    | Amino acid   |
| 20 | 24.6081  | Glycerate                        | 3TMS | 86          | +     | +    | 16659    | Sugar acid   |
| 21 | 24.7252  | Fumarate                         | 2TMS | 94          | +     | +    | 18012    | Organic acid |
| 22 | 25.0506  | Pelargonic acid                  | 1TMS | 70          | -     | +    | 29019    | Fatty acid   |
| 23 | 25.5311  | Serine                           | 3TMS | 97          | +     | +    | 17822    | Amino acid   |
| 24 | 26.3006  | Threonine                        | 3TMS | 97          | +     | +    | 16398    | Amino acid   |

|    |         |                      |      |    |   |   |       |                         |
|----|---------|----------------------|------|----|---|---|-------|-------------------------|
| 25 | 27.2343 | Beta-Alanine         | 3TMS | 73 | + | + | 16958 | Amino acid              |
| 26 | 27.5909 | Ornithine-1,5-lactam | 2TMS | 82 | + | - | 76341 | Others                  |
| 27 | 27.8048 | Homoserine           | 3TMS | 70 | + | - | 30653 | Amino acid              |
| 28 | 28.7035 | Malate               | 3TMS | 96 | + | + | 6650  | Organic acid            |
| 29 | 29.2077 | Pyroglutamic acid    | 2TMS | 96 | + | + | 16010 | Others                  |
| 30 | 29.3062 | Methionine           | 2TMS | 60 | + | + | 16811 | Amino acid              |
| 31 | 29.4650 | Aspartate            | 3TMS | 94 | + | + | 22660 | Amino acid              |
| 32 | 29.8269 | GABA                 | 3TMS | 84 | + | + | 16865 | Amino acid              |
| 33 | 30.7013 | Threonate            | 4TMS | 72 | - | + | 15908 | Sugar acid              |
| 34 | 31.7885 | Glutamate            | 3TMS | 86 | + | + | 16015 | Amino acid              |
| 35 | 31.8988 | Phenylalanine        | 2TMS | 83 | + | + | 17295 | Amino acid              |
| 36 | 32.2782 | Lauric acid          | 1TMS | 74 | - | + | 30805 | Fatty acid              |
| 37 | 32.9159 | Asparagine           | 3TMS | 97 | + | + | 17196 | Amino acid              |
| 38 | 35.1627 | Glutamine            | 3TMS | 93 | + | + | 18050 | Amino acid              |
| 39 | 35.3133 | Octopamine           | 3TMS | 70 | - | + | 17134 | Others                  |
| 40 | 35.8866 | Glycerate 3P         | 4TMS | 70 | - | + | 17050 | Phosphorylated compound |
| 41 | 35.9753 | Shikimate            | 4TMS | 80 | + | + | 36208 | Organic acid            |
| 42 | 36.3359 | Isocitrate           | 4TMS | 76 | + | + | 30887 | Organic acid            |
| 43 | 36.5081 | Ornithine            | 4TMS | 82 | + | - | 15729 | Amino acid              |
| 44 | 37.0650 | Fructose             | 5TMS | 94 | + | + | 28757 | Sugar                   |
| 45 | 37.9558 | Histidine            | 3TMS | 70 | + | - | 15971 | Amino acid              |
| 46 | 38.5760 | Tyrosine             | 3TMS | 70 | + | - | 17895 | Amino acid              |
| 47 | 38.5878 | Lysine               | 4TMS | 75 | - | + | 18019 | Amino acid              |
| 48 | 39.0548 | Glucose              | 5TMS | 97 | + | + | 17634 | Sugar                   |
| 49 | 40.3479 | Palmitic acid        | 1TMS | 92 | + | + | 15756 | Fatty acid              |
| 50 | 40.5495 | Gluconate            | 6TMS | 70 | + | + | 86359 | Sugar acid              |
| 51 | 40.8616 | Galactarate          | 6TMS | 86 | + | + | 30852 | Sugar acid              |
| 52 | 42.3888 | Myo-Inositol         | 6TMS | 97 | + | + | 17268 | Others                  |

|                           |         |                          |      |    |   |   |       |                         |
|---------------------------|---------|--------------------------|------|----|---|---|-------|-------------------------|
| 53                        | 42.8462 | Phytol                   | 1TMS | 78 | + | - | 17327 | Others                  |
| 54                        | 43.2458 | Linoleic acid            | 1TMS | 90 | + | + | 17351 | Fatty acid              |
| 55                        | 43.3708 | Oleic acid               | 1TMS | 75 | - | + | 16196 | Fatty acid              |
| 56                        | 43.8634 | Stearic acid             | 1TMS | 54 | + | + | 28842 | Fatty acid              |
| 57                        | 44.8401 | Fructose-6-Phosphate     | 6TMS | 80 | + | + | 78697 | Phosphorylated compound |
| 58                        | 45.1549 | Mannose-6-phosphate      | 6TMS | 72 | + | + | 17369 | Phosphorylated compound |
| 59                        | 46.0508 | Chlorogenic acid         | 6TMS | 85 | + | + | 16112 | Others                  |
| 60                        | 46.8596 | Glucose-6-phosphate      | 6TMS | 91 | - | + | 14314 | Phosphorylated compound |
| 61                        | 47.0775 | Arachidic acid           | 1TMS | 34 | + | + | 28822 | Fatty acid              |
| 62                        | 47.8294 | Myo-inositol-1-phosphate | 7TMS | 70 | - | + | 18297 | Phosphorylated compound |
| 63                        | 49.7481 | 1-Monopalmitoylglycerol  | 2TMS | 86 | + | + | 69081 | Fatty acid              |
| 64                        | 52.5342 | Sucrose                  | 8TMS | 93 | + | + | 17992 | Sugar                   |
| 65                        | 53.8960 | Glycerol monostearate    | 2TMS | 93 | + | + | 75555 | Fatty acid              |
| 66                        | 59.2775 | Beta-Melibiose           | 8TMS | 96 | + | + | 28053 | Sugar                   |
| + Detected; - No detected |         |                          |      |    |   |   |       |                         |

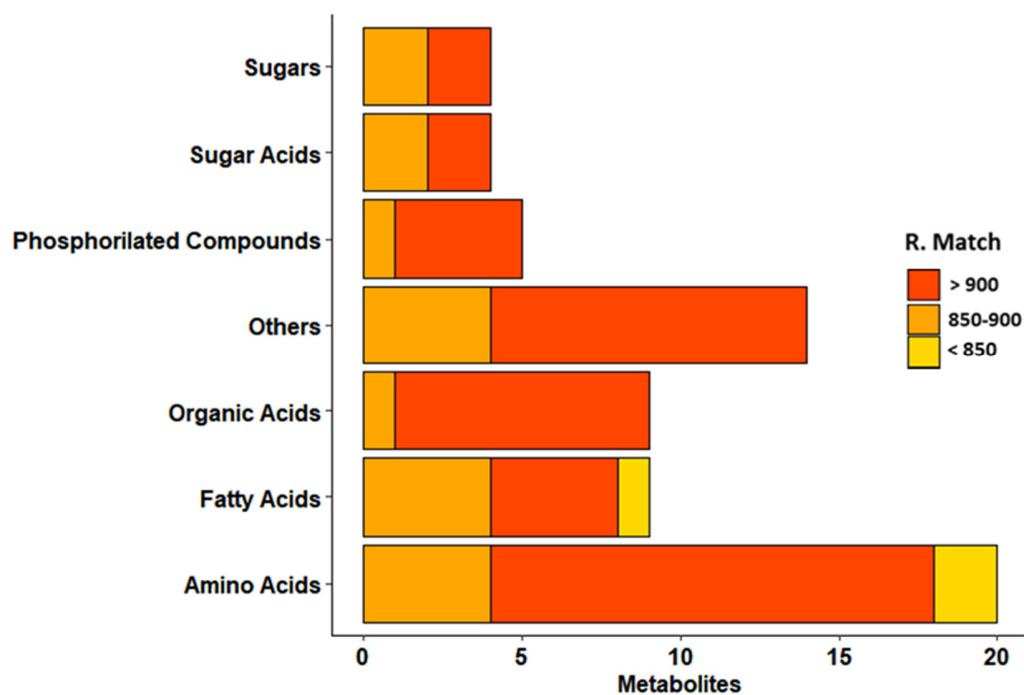

Figure S1. Categorization of detected metabolites. Y axes represent the number of metabolites while X is the category. The bars are stacked by the R. Match value of each detected metabolite. It can be seen that most R. Match values are > 850 and only a very few are below 850.

**(a) Shoot**

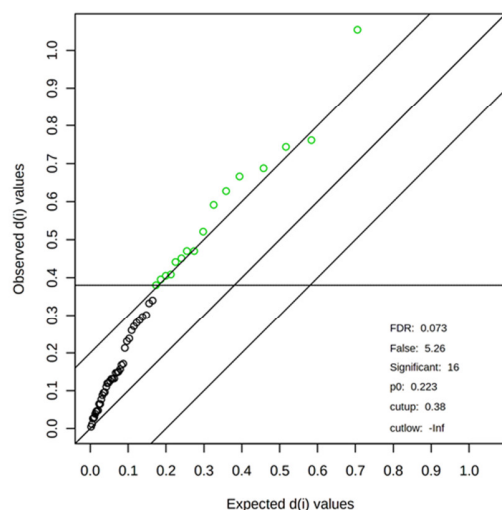

**(b) Root**

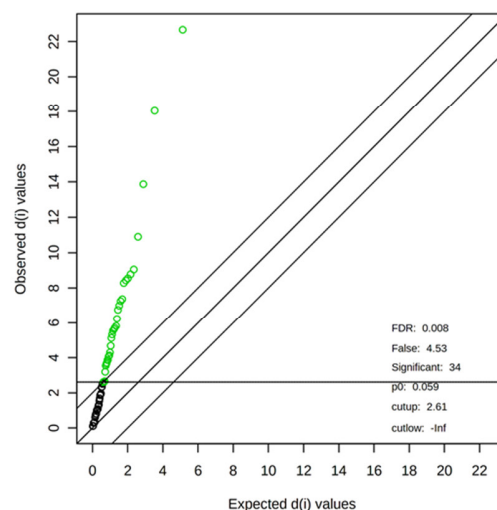

**Figure S2.** Significance Analysis of Microarrays SAM to detect metabolites with significant relative abundances in response to affinin. . **(a)** Shoots thirteen and **(b)** Roots thirty-seven metabolites with statistical differences. Delta is the distance between the observed and the expected (ordered) test scores. Plot shows the observed relative difference versus the expected relative difference estimated by data permutation. The horizontal lines are the delta value (0.2 for shoots and 2.0 for roots). The solid diagonal line indicates where these two measures are the same. The significant features are highlighted in green.

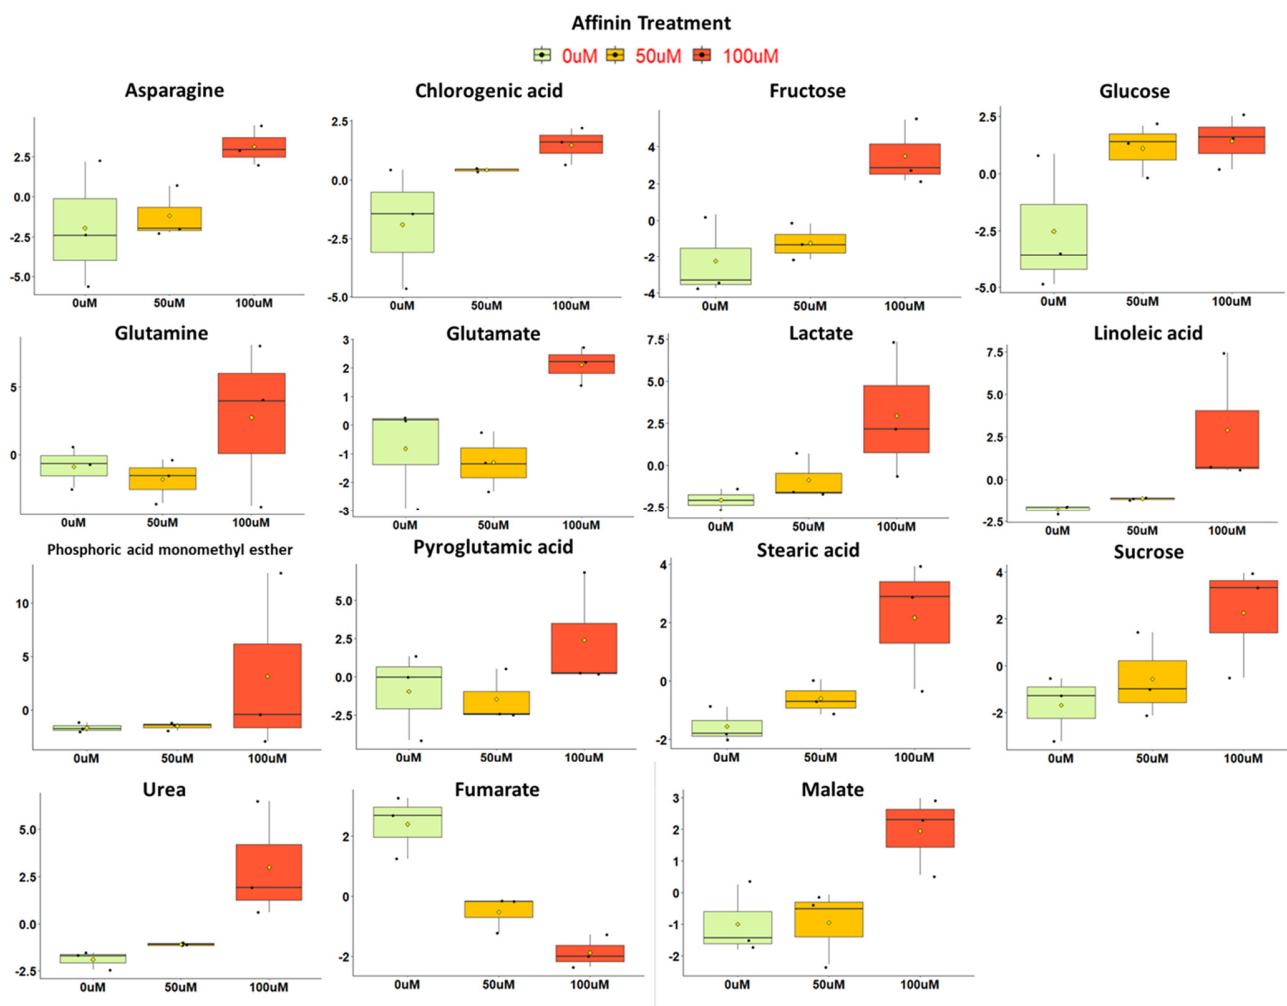

**Figure S 3** Box plot of the normalized relative abundances of the thirteen metabolites detected with the SAM analysis. Data were normalized by dividing the compound peak area by fresh weight of sample, then transformed with the cube root transformation and scaled by Pareto algorithm. Due to this process, we obtained negative scale in the Y-axis in some of the bins (Metaboanalyst 4.0). The bar plots show the normalized values (mean  $\pm$  one standard deviation). The boxes range from the 25% and the 75% percentiles; the 5% and 95% percentiles are indicated as error bars. Single data points are indicated by black circles. Medians are indicated by horizontal lines within each box and means are indicated by a yellow diamond.

# Affinin Treatment

0uM 50uM 100uM

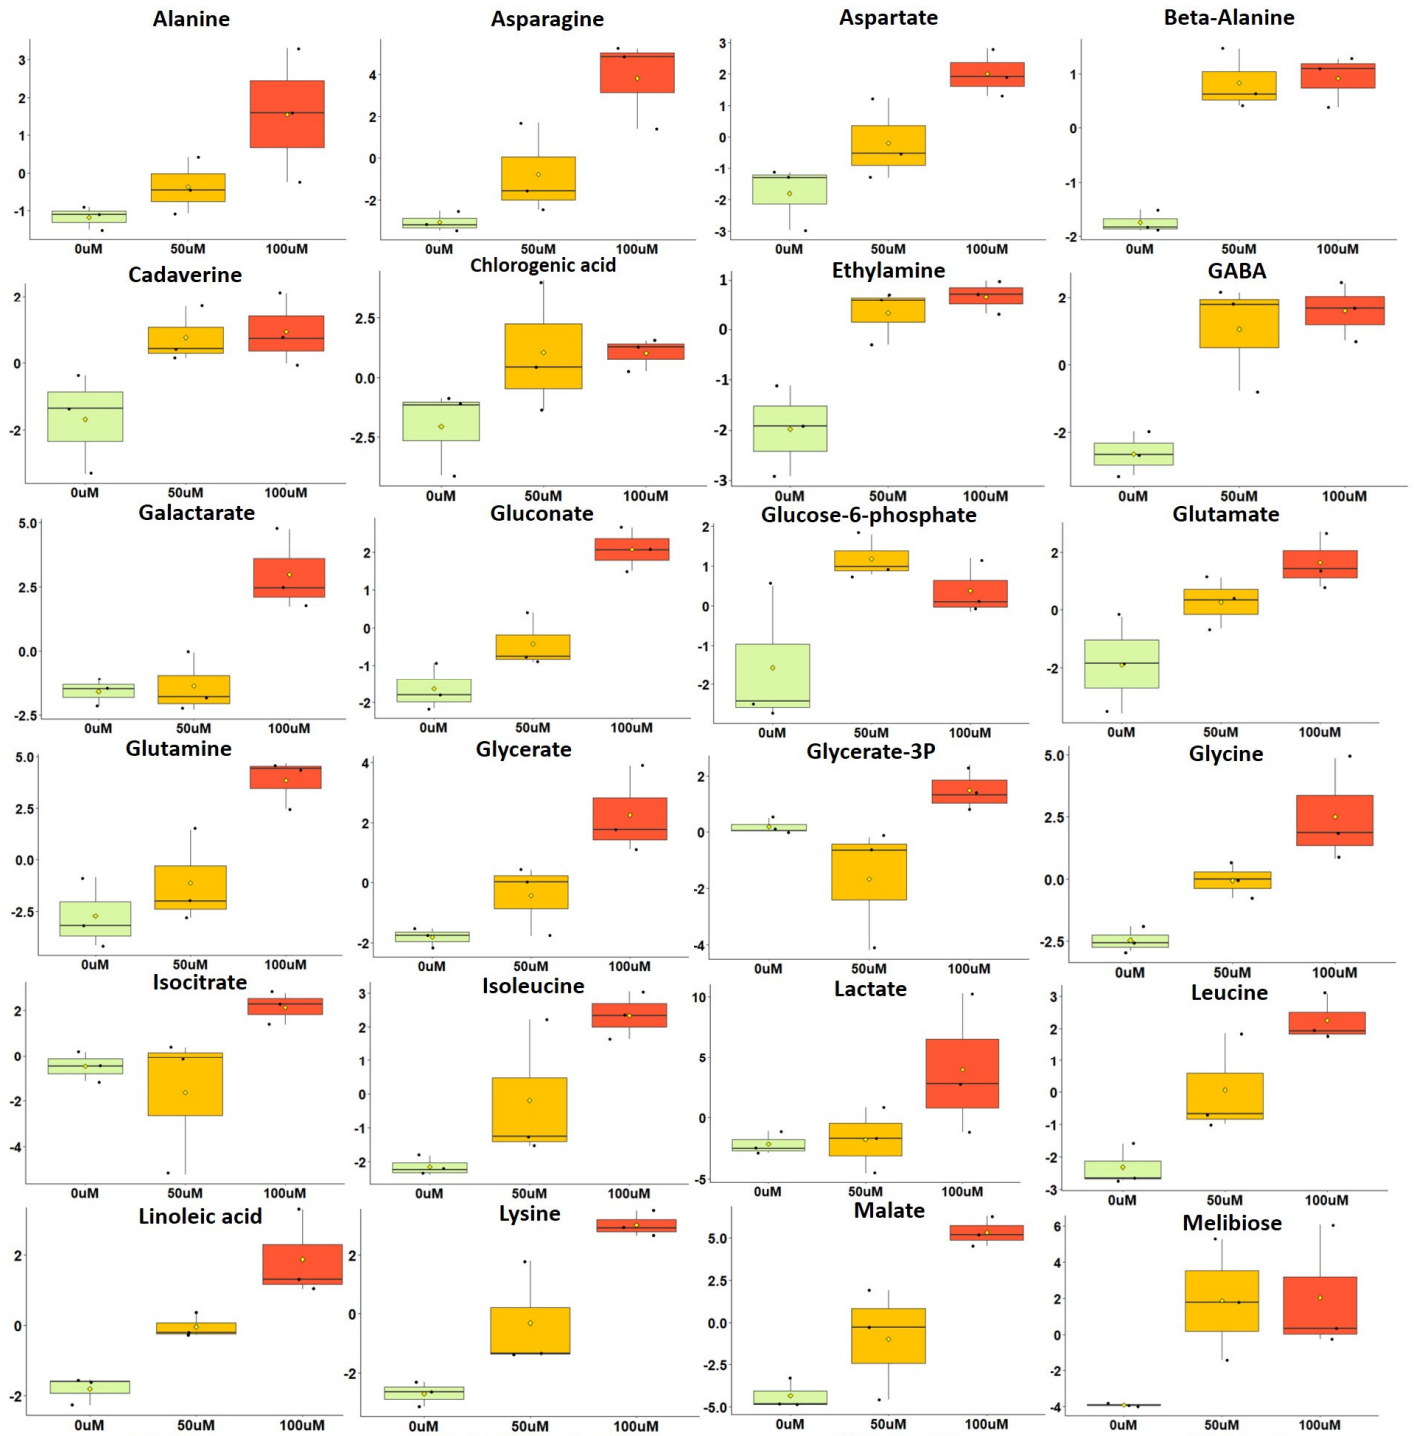

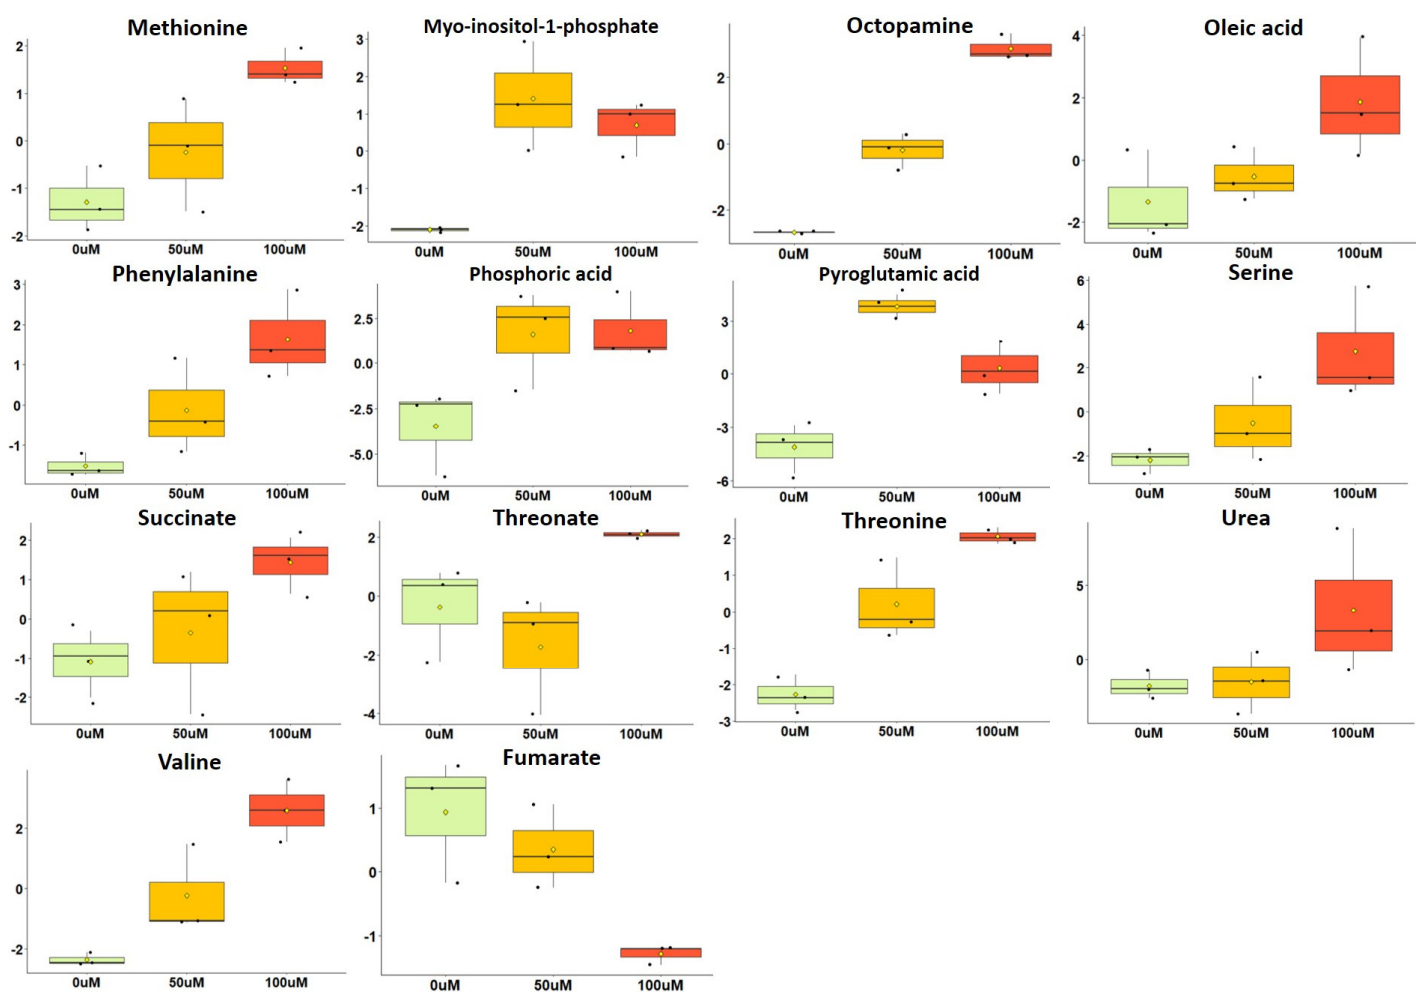

**Figure S 4.** Box plot of the normalized relative abundances of the thirty-seven metabolites detected with the SAM analysis. Y axes are represented as normalized relative abundances. Data were normalized by dividing the compound peak area by fresh weight of sample, then transformed with the cube root transformation and scaled by Pareto algorithm. Due to this process, we obtained negative scale in the Y-axis in some of the bins (Metaboanalyst 4.0). The bar plots show the normalized values (mean  $\pm$  one standard deviation). The boxes range from the 25% and the 75% percentiles; the 5% and 95% percentiles are indicated as error bars. Single data points are indicated by black dots. Medians are indicated by horizontal lines within each box and means are indicated by a yellow diamond.
